# Supplementary material for: Synthesis of diketopyrrolopyrrole and anthraquinone-based polymers of D–A1–D–A2 architecture by direct arylation polycondensation and designing inorganic/organic nano-heterostructured photoanodes for visible light water splitting
Source: Royal Society of Chemistry journal article supplement (doi:10.1039/d1se01799c), 2022-01-01
Supplement: d1se01799c1.pdf [file d1se01799c1.pdf]

### **Electronic Supplementary Information**

## **Synthesis of diketopyrrolopyrrole and anthraquinone-based polymers of D-A1-D-A2 architecture by direct arylation polycondensation and designing inorganic/organic nano-heterostructured photoanodes for visible light water splitting**

Mr. Nani Gopal Ghosh<sup>†</sup>, Dr. Ayan Sarkar<sup>†\*</sup>, Mr. Chandan Kumar, Mr. Himadri Shekhar Karmakar, Mr. Devendra Mayurdhwaj Sanke, and Prof. Sanjio S. Zade\*

Department of Chemical Sciences and Centre for Advanced Functional Materials, Indian Institute of Science Education and Research (IISER) Kolkata, Mohanpur, Nadia, West Bengal, PIN-741246, India.

<sup>†</sup> Authors contributed equally.

\*Corresponding Authors: A. Sarkar ([visit2ayan@gmail.com](mailto:visit2ayan@gmail.com)), S. S. Zade ([sanjiozade@iiserkol.ac.in](mailto:sanjiozade@iiserkol.ac.in))

## Contents

|                                                                                                                           |            |
|---------------------------------------------------------------------------------------------------------------------------|------------|
| <b>Materials and reagents .....</b>                                                                                       | <b>S3</b>  |
| <b>Materials and reagents for organic synthesis .....</b>                                                                 | <b>S3</b>  |
| <b>Materials and reagents for inorganic synthesis.....</b>                                                                | <b>S3</b>  |
| <b>Material syntheses.....</b>                                                                                            | <b>S3</b>  |
| <b>Monomer syntheses.....</b>                                                                                             | <b>S3</b>  |
| <b>1,5-bis [(2-ethylhexyl)oxy]-2,6-diiodoanthracene-9, 10- dione (2) .....</b>                                            | <b>S3</b>  |
| <b>1, 5-bis((2-ethylhexyl)oxy)-4,8-di(thiophen-2-yl)anthracene-9,10-dione (4) .....</b>                                   | <b>S4</b>  |
| <b>4,8-bis(5-bromothiophen-2-yl)-1,5-bis((2-ethylhexyl)oxy)anthracene-9,10-dione (5) .....</b>                            | <b>S5</b>  |
| <b>Polymer syntheses .....</b>                                                                                            | <b>S5</b>  |
| <b>Synthesis of PAQTDPP .....</b>                                                                                         | <b>S5</b>  |
| <b>Synthesis of PAQBDPP.....</b>                                                                                          | <b>S6</b>  |
| <b>Synthesis of nitrogen-doped TiO<sub>2</sub> nanorods (N-TiO<sub>2</sub> NRs).....</b>                                  | <b>S6</b>  |
| <b>Fabrication of N-TiO<sub>2</sub>/PAQTDPP and N-TiO<sub>2</sub>/PAQBDPP NHs .....</b>                                   | <b>S6</b>  |
| <b>General measurements and characterizations .....</b>                                                                   | <b>S7</b>  |
| <b>Characterizations for the organic materials.....</b>                                                                   | <b>S7</b>  |
| <b>Characterization for the inorganic and inorganic/organic nano-hybrid materials .....</b>                               | <b>S7</b>  |
| <b>Photoelectrochemical measurements .....</b>                                                                            | <b>S8</b>  |
| <b>Supplementary results and discussion .....</b>                                                                         | <b>S9</b>  |
| <b>TGA and DSC thermograms .....</b>                                                                                      | <b>S9</b>  |
| <b>Crystallographic information .....</b>                                                                                 | <b>S10</b> |
| <b>FTIR results.....</b>                                                                                                  | <b>S11</b> |
| <b>NMR Spectra .....</b>                                                                                                  | <b>S13</b> |
| <b>Theoretical Calculation .....</b>                                                                                      | <b>S17</b> |
| <b>FESEM micrographs of NHs samples used for stability test .....</b>                                                     | <b>S19</b> |
| <b>Water oxidation onset potential.....</b>                                                                               | <b>S19</b> |
| <b>Additional impedance studies .....</b>                                                                                 | <b>S20</b> |
| <b>Comparison of the performances of the present electrodes with the other inorganic/organic hybrid photoanodes .....</b> | <b>S21</b> |
| <b>PL studies.....</b>                                                                                                    | <b>S22</b> |
| <b>References .....</b>                                                                                                   | <b>S24</b> |

## Materials and reagents

### Materials and reagents for organic synthesis

All the reactions were done under a nitrogen environment to maintain dry conditions. Toluene and THF (tetrahydrofuran) were distilled from sodium/benzophenone wire before use. 1,5-dihydroxyanthraquinone (anthrarufin), *o*-phenylenediamine, thiophene, tributyltinchloride ( $\text{Bu}_3\text{SnCl}$ ), tetrakis(triphenylphosphine)palladium(0) ( $\text{Pd}(\text{PPh}_3)_4$ ), tris(dibenzylideneacetone)dipalladium(0)-chloroform adduct ( $\text{Pd}_2(\text{dba})_3\cdot\text{CHCl}_3$ ), tris(*o*-tolyl)phosphine ( $\text{P}(\text{o-tol})_3$ ), triphenylphosphine ( $\text{PPh}_3$ ), and  $\text{TBAPF}_6$  were acquired from Aldrich and used without further purification. Iodine and iodic acid were purchased from Merck and Aldrich, respectively, and used without further purification. *n*-BuLi (1.6 M in hexane) was bought from Spectrochem.

### Materials and reagents for inorganic synthesis

Titanium (IV) butoxide ( $\text{Ti}(\text{OBu})_4$ , Sigma-Aldrich, 97% assay), fluorine-doped tin oxide (FTO) coated glass substrate ( $\sim 7 \text{ Ohm/Sq.}$ , Sigma-Aldrich), hydrochloric acid ( $\text{HCl}$  37%, Merck India), ammonia solution (28-30%, Merck India), deionized water (DI water, Merck Millipore).

## Material syntheses

### Monomer syntheses

3,6-di(thiophen-2-yl)-2,5-dihydropyrrolo[3,4-*c*]pyrrole-1,4-dione, 2,5-bis(2-ethylhexyl)-3,6-di(thiophen-2-yl)-2,5-dihydropyrrolo[3,4-*c*]pyrrole-1,4-dione (**3**)<sup>[1]</sup> 1,5-bis((2-ethylhexyl)oxy)anthracene-9,10-dione (**1**)<sup>[2]</sup> were synthesized according to the previously reported procedure.

### 1,5-bis [(2-ethylhexyl)oxy]-2,6-diiodoanthracene-9, 10- dione (**2**)

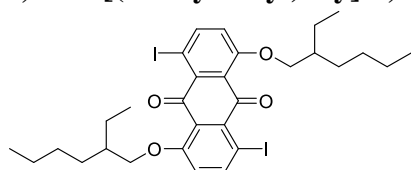

To a stirred solution of 1, 5-di O-(2-ethylhexyloxy)-anthraquinone (464 mg, 1 mmol) in 10 ml AcOH, NIS (450 mg, 2 mmol), TfOH (300 mg 2.0 mmol), were added. Subsequently, it was stirred at rt for 12 h. Then 10 ml of a saturated solution of  $\text{Na}_2\text{S}_2\text{O}_3$  was added to the reaction mixture. AcOH in the reaction mixture was neutralized by a saturated solution of  $\text{NaHCO}_3$ . The reaction mixture was extracted with 3×20 ml ethyl acetate, and it was recrystallized from DCM/EtOH mixture in 98% yield (702 mg).

$^1\text{H}$  NMR: (400MHz,  $\text{CDCl}_3$ ):  $\delta$  = 8.02 (d,  $J$  = 9.0Hz, 2H), 6.85 (d,  $J$  = 8.9Hz, 2H), 3.96 (m, 4H), 1.82-1.34 (m,  $J$  = 7 Hz, 16H), 0.92(t,  $J$  = 7Hz, 6H).

$^{13}\text{C}$  NMR (101 MHz,  $\text{CHLOROFORM-D}$ )  $\delta$  182.81, 158.43, 149.07, 146.57, 138.37, 124.85, 78.99, 72.03, 44.94, 39.51, 30.51, 29.26, 23.89, 23.24, 14.28, 11.40.

HRMS: (ESI) Calculated for  $\text{C}_{30}\text{H}_{38}\text{O}_4\text{I}_2$   $[\text{M}+\text{H}]^+$  calculated 717.08, found 717.09.

**1, 5-bis((2-ethylhexyl)oxy)-4,8-di(thiophen-2-yl)anthracene-9,10-dione (4)**

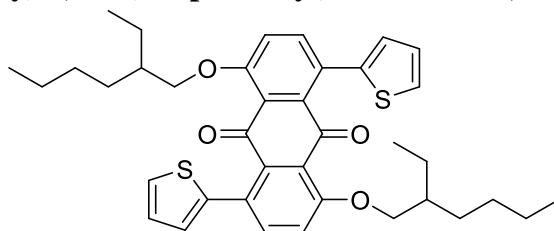

To a stirred deoxygenated solution of 1,5-bis((2-ethylhexyl)oxy)-4,8-diiodoanthracene-9,10-dione (2 g, 2.79 mmol) and tributyl(thiophene-2-yl)stannane (4.4 g, 11.53 mmol) in 40 ml toluene,  $\text{Pd}(\text{PPh}_3)_4$  (400 mg, 0.27 mmol) was added under nitrogen atmosphere and the reaction mixture was purged with  $\text{N}_2$  for 10 min. It was then heated to 110  $^\circ\text{C}$  for 24 h. After that, the reaction mixture was cooled down to room temperature (RT), and toluene was removed under reduced pressure. A saturated solution of KF was added to the reaction mixture. The reaction mixture was extracted with 3 $\times$ 20 ml ethyl acetate and dried over  $\text{Na}_2\text{SO}_4$ . The solvent was removed under reduced pressure; it was purified by 2-5% ethyl acetate in hexane to give as a reddish-yellow solid (1.5 g, 85%).

$^1\text{H}$  NMR (400 MHz, Chloroform-d)  $\delta$  7.57 (d,  $J$  = 8.8 Hz, 2H), 7.32 (d,  $J$  = 4.1 Hz, 2H), 7.12 (d,  $J$  = 8.9 Hz, 2H), 7.06 (d, 2H), 7.06 – 7.03 (m, 2H), 3.98 (m, 4H), 1.77 (m, 2H), 1.57 (m, 2H), 1.46 (m, 4H), 1.33 (m, 8H), 0.92 (m, 12H).

$^{13}\text{C}$  NMR (101 MHz, Chloroform-d)  $\delta$  184.92, 157.34, 141.26, 137.30, 127.18, 125.60, 125.20, 124.58, 115.94, 71.36, 39.38, 30.34, 29.29, 23.68, 23.20, 14.36, 11.30.

HRMS: (ESI) Calculated for  $\text{C}_{38}\text{H}_{44}\text{O}_4\text{S}_2$   $[\text{M}+\text{Na}]^+$  651.2573, found 651.2556.

#### 4,8-bis(5-bromothiophen-2-yl)-1,5-bis((2-ethylhexyl)oxy)anthracene-9,10-dione (**5**)

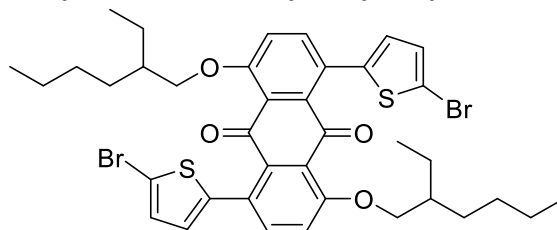

Compound **4** (0.76 g, 2.71 mmol) was dissolved in chloroform (15 ml), and then NBS (1.01 g, 5.69 mmol) was added portion-wise to it in dark condition at RT. After 4 h of stirring at RT, water was added to the reaction mixture. The reaction mixture was extracted with 3×20 ml chloroform and dried over Na<sub>2</sub>SO<sub>4</sub>. The solvent was removed under reduced pressure, and then the compound was purified by silica gel column chromatography with ethyl acetate/hexane 2-5% to obtain compound **5** as a greenish-yellow (1.1 g, 88%) solid.

<sup>1</sup>H NMR (400 MHz, Chloroform-d) δ 7.51 (d, *J* = 8.9 Hz, 2H), 7.12 (d, *J* = 8.8 Hz, 2H), 6.99 (d, *J* = 3.8 Hz, 2H), 6.82 (d, *J* = 3.7 Hz, 2H), 3.98 (m, 2H), 1.76 (s, 1H), 1.46 (s, 3H), 1.32 (s, 5H), 0.91 (s, 6H).

<sup>13</sup>C NMR (101 MHz, Chloroform-d) δ 184.59, 157.74, 142.80, 137.37, 129.92, 127.49, 124.45, 124.30, 116.13, 112.40, 71.43, 39.29, 29.29, 29.19, 23.71, 23.19, 14.36, 11.28.

HRMS: (ESI) Calculated for C<sub>38</sub>H<sub>42</sub>O<sub>4</sub>S<sub>2</sub>Br<sub>2</sub> [M]<sup>+</sup> 786.09.

### Polymer syntheses

#### Synthesis of PAQTDPP

1,5-bis((2-ethylhexyl)oxy)-4,8-diiodoanthracene-9,10-dione (**2**) (123.2 mg, 0.2 mmol) and 2,5-bis(2-ethylhexyl)-3,6-di(thiophene-2-yl)-2,5-dihydropyrrolo[3,4-c]pyrrole-1,4-dione (**3**) (105 mg, 0.2 mmol), Pd<sub>2</sub>(dba)<sub>3</sub>·CHCl<sub>3</sub> (9.15 mg, 4.4 mol%), P(*o*-MeOPh)<sub>3</sub> (12.5mg, 8.8 mol%), pivalic acid (20.5 mg, 0.20 mmol), and Cs<sub>2</sub>CO<sub>3</sub> (195 mg, 0.60 mmol) were added in a round bottom flask with a condenser and a magnetic stirring bar under nitrogen atmosphere. Then 5 ml degassed toluene was added to the reaction mixture. The mixture was heated to 120 °C under magnetic stirring for 24 h. After cooling to room temperature, the mixture was precipitated in methanol. The crude polymer was collected by filtration and purified by Soxhlet extraction with acetone, hexane, and chloroform successively. The chloroform solution was concentrated and was reprecipitated into methanol. Yield: 92% (154 mg).

### Synthesis of PAQBTDP

4,8-bis(5-bromothiophen-2-yl)-1,5-bis((2-ethylhexyl)oxy)anthracene-9,10-dione (**3**) (250 mg, 0.317 mmol) and 2,5-bis(2-ethylhexyl)-3,6-di(thiophene-2-yl)-2,5-dihydropyrrolo[3,4-c]pyrrole-1,4-dione (**1**) (167 mg, 0.317 mmol), Pd<sub>2</sub>(dba)<sub>3</sub>·CHCl<sub>3</sub> (14.5 mg, 0.014 mmol), P(*o*-MeOPh)<sub>3</sub> (11.11 mg, 0.0315 mmol), pivalic acid (32.5 mg, 0.317 mmol), and Cs<sub>2</sub>CO<sub>3</sub> (310 mg, 0.95 mmol) were added in a round bottom flask with a condenser with a magnetic stirring bar under nitrogen atmosphere. Then 5 ml degassed toluene was added to the reaction mixture. The mixture was heated to 120 °C under magnetic stirring for 24 h. After cooling to room temperature, the mixture was precipitated in methanol. The crude polymer was collected by filtration and purified by Soxhlet extraction with acetone, hexane, and chloroform successively. The chloroform solution was concentrated and was reprecipitated into methanol. Yield: 85.2% (298 mg).

### Synthesis of nitrogen-doped TiO<sub>2</sub> nanorods (N-TiO<sub>2</sub> NRs)

At first, pristine rutile TiO<sub>2</sub> NRs were grown on the FTO coated glass substrate, as described in our previous publication.<sup>[2]</sup> Briefly, 0.3 ml Ti(OBu)<sub>4</sub> was slowly drop-casted into a solution of 8 ml DI water and 8 ml HCl under magnetically stirring conditions, and the solution was further stirred for another 20 min. Then previously cleaned FTO substrates (1×2 cm<sup>2</sup>) were inserted into a 25 ml Teflon-lined vessel in tilted condition with the FTO coated surface facing upward. A suitable amount of the titanium precursor solution was poured into the vessel. The vessel was placed inside of a stainless steel autoclave and heated at 150 °C for 4 h. After natural cooling, the FTO substrates were properly cleaned by ethanol, isopropanol, and water and dried.

The nitrogen doping in TiO<sub>2</sub> was achieved by soaking TiO<sub>2</sub> in an ammonia solution, followed by annealing in an argon atmosphere.<sup>[3]</sup> The as-prepared TiO<sub>2</sub>/FTO samples were vertically attached inside a closed glass vessel, and only the TiO<sub>2</sub> containing part of the FTO substrate was dipped in a 28-30% ammonia solution for 24 h. The remaining conducting part surface of the FTO coated substrate was masked with Teflon tape. After 24 h, the samples were rinsed with water and ethanol and dried with tissue paper. Finally, the samples were annealed at 450 °C for 2 h under argon gas flow.

### Fabrication of N-TiO<sub>2</sub>/PAQTDPP and N-TiO<sub>2</sub>/PAQBTDP NHs

The N-TiO<sub>2</sub>/PAQTDPP and N-TiO<sub>2</sub>/PAQBTDP NHs thin films were fabricated using the simple spin-coating technique. Firstly, two different solutions of PAQTDPP and PAQBTDP polymers were prepared by dissolving 5 mg of the respective polymers in 1 ml CHCl<sub>3</sub>. For

preparing N-TiO<sub>2</sub>/PAQTDPP NHs, the surface of the N-TiO<sub>2</sub>/FTO sample was properly drenched by drop-casting the freshly prepared PAQTDPP solution, and then the N-TiO<sub>2</sub>/FTO sample was spun at 3000 rpm for 15 s in a spin-coater. Lastly, the spin-coated samples were annealed at 100 °C under nitrogen gas flow for 1 h inside a conical flask, placed inside a silicone oil bath. The same method was followed to fabricate the N-TiO<sub>2</sub>/PAQBDTPP NHs thin films, except the PAQBDTPP solution was used instead of the PAQTDPP solution.

## **General measurements and characterizations**

### **Characterizations for the organic materials**

<sup>1</sup>H nuclear magnetic resonance (NMR) and <sup>13</sup>C NMR spectra were recorded using a JEOL ECS 400 MHz and Bruker AVANCE 500 MHz spectrometer with CDCl<sub>3</sub> or DMSO-*d*<sub>6</sub> as the solvent, and chemical shifts ( $\delta$ ) are reported in parts per million (ppm) relative to tetramethylsilane as the standard internal values. The coupling constants (*J*) are given in Hz. The apparent resonance multiplicity is described as s (singlet), br s (broad singlet), d (doublet), t (triplet), q (quartet), and m (multiplet).

### **Characterization for the inorganic and inorganic/organic nano-hybrid materials**

The structure and morphology of the as-prepared N-TiO<sub>2</sub> NRs, N-TiO<sub>2</sub>/PAQTDPP NHs, and N-TiO<sub>2</sub>/PABQTDPP NHs were studied by a field-emission electron microscope (FESEM, Zeiss SUPRA 55-VP). An atomic force microscope (AFM, Ntegra Prima, NT-MDT Spectrum Instruments) was used to probe the topography of the materials. Thermogravimetric analysis (TGA) and Differential scanning calorimetry (DSC) were done using the Mettler Toledo instruments. The X-ray diffraction (XRD) patterns of the N-TiO<sub>2</sub> NRs, N-TiO<sub>2</sub>/PAQTDPP NHs, N-TiO<sub>2</sub>/PABQTDPP NHs, and polymer powders were recorded using a Rigaku MiniFlex diffractometer, where a Cu K $\alpha$  line ( $\lambda$  = 1.54 Å) was used as the X-ray source. Solid-state room temperature UV-Vis-NIR absorption spectra of all the materials were recorded using an Agilent Cary 3500 spectrophotometer. The room temperature solid-state photoluminescence spectra of all the materials were recorded utilizing a Horiba Fluoromax 4 Spectrofluorometer (excitation wavelength 325 nm). Monochromatic X-ray photoelectron spectroscopy (XPS, Kratos Analytical, AXIS Supra, Al anode) was also used to analyze the constituent elements and their ionic states of the N-TiO<sub>2</sub>/PAQTDPP NHs sample. The polymers' Fourier transform infrared (FTIR) spectra were taken using the Perkin-Elmer Spectrum Two FT-IR spectrometer. After the 1 h photostability tests, the polymers were taken out of the NHs by dissolving in CHCl<sub>3</sub> and were used for FTIR analysis. The time-resolved photoluminescence (TRPL) studies were executed employing the time-correlated single-photon counting (TCSPC) method utilizing a picosecond spectrofluorometer (Horiba Jobin Yvon IBH equipped with a FluoroHub single-

photon counting controller). The NHs samples were scratched off the FTO substrates and dispersed in DI water. The dispersion was excited by a 375 nm diode laser, and the emission decay at 410 nm was recorded in each case. The TRPL spectra of the two polymers were recorded using their CHCl<sub>3</sub> solutions. The polymers were excited at their respective absorption maxima, and the decay was recorded at the emission maxima.

### Photoelectrochemical measurements

The photoelectrochemical measurements were carried out using a three-electrode electrochemical workstation (CH Instruments, CHI 608D) inside a standard electrochemical cell. The samples (prepared on FTO substrate) served as the working electrode, a Pt wire as the counter electrode, and an Ag/AgCl (saturated in 1 M aq. KCl) as the reference electrode. A 0.5 M aq. Na<sub>2</sub>SO<sub>4</sub> solution (pH~ 6.7) was used as the electrolyte for all the measurements unless another electrolyte is explicitly mentioned.

The linear sweep voltammetry (LSV) measurements ranged from -1 V<sub>Ag/AgCl</sub> to 1 V<sub>Ag/AgCl</sub> at 10 mV/s. The Mott-Schottky measurements were performed by running the impedance-potential program at 1 kHz in the range of -1 V<sub>Ag/AgCl</sub> to 1 V<sub>Ag/AgCl</sub>. The electrochemical impedance spectroscopy (EIS)-related measurements were performed by executing the AC impedance from 1 MHz to 0.1 Hz at 0 V<sub>Ag/AgCl</sub> (DC) with 5 mV AC perturbation.

A Newport Xe lamp with AM 1.5G filter and adjusted light intensity of 100 mW/cm<sup>2</sup> was used as the light source.

Using the following formula, the potential measured against the Ag/AgCl reference electrode has been converted against the reversible hydrogen electrode (RHE).

$$V_{RHE} = V_{Ag/AgCl} + 0.059 \times pH + V_{Ag/AgCl}^0$$

Here,  $V_{Ag/AgCl}^0 = 0.1976$  V at 298 K in saturated KCl.

The amount of photoelectrochemically produced hydrogen gas and oxygen gas were collected separately (as shown in Figure S1) using a graduated inverted burette, keeping the other experimental parameter the same under visible light illumination from a 100 W Xe lamp intensity of 100 mW/cm<sup>2</sup>. Oxygen was collected at the working electrode (WE, NHs photoanode), while hydrogen was collected at the counter electrode (CE, Pt wire).

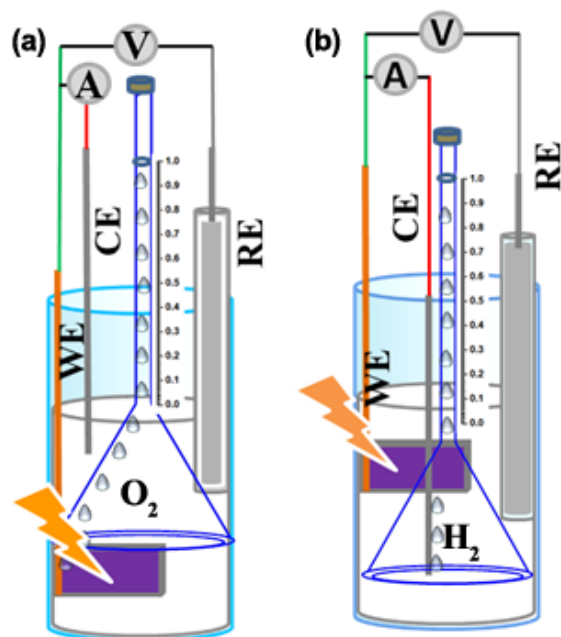

Figure S1: Schematic diagrams of the inverted-burette arrangements to collect photoelectrochemically generated (a)  $O_2$  and (b)  $H_2$ .

## Supplementary results and discussion

### TGA and DSC thermograms

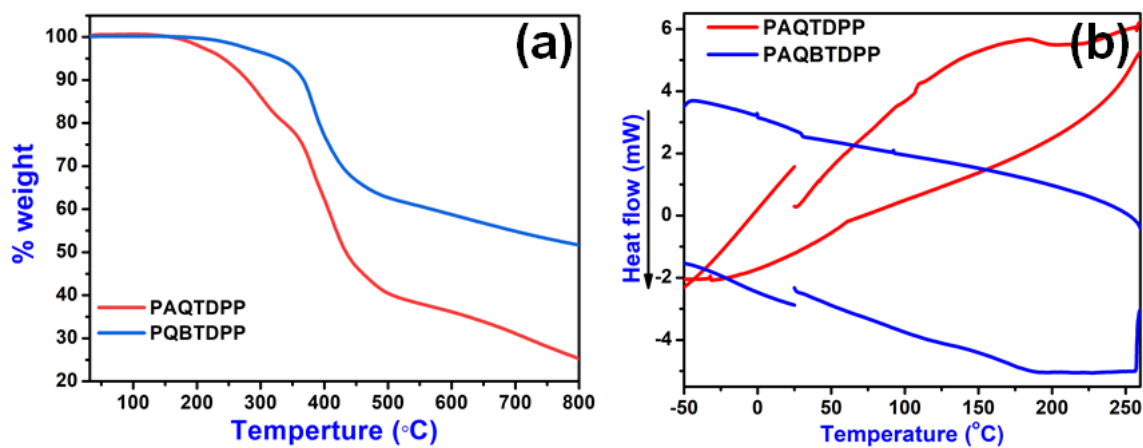

Figure S2: The (a) TGA and (b) DSC thermograms of PAQTDPP and PAQBDTPP polymers.

## Crystallographic information

Table S1: Crystallographic data of Compound **2**.

|                                                |                                                                |
|------------------------------------------------|----------------------------------------------------------------|
| Identification code                            | Compound <b>2</b>                                              |
| Empirical formula                              | C <sub>22</sub> H <sub>22</sub> I <sub>2</sub> O <sub>4</sub>  |
| Formula weight                                 | 604.20                                                         |
| Temperature/K                                  | 100.00(10)                                                     |
| Crystal system                                 | orthorhombic                                                   |
| Space group                                    | Fdd2                                                           |
| a/Å                                            | 10.4919(3)                                                     |
| b/Å                                            | 27.9599(10)                                                    |
| c/Å                                            | 14.2253(5)                                                     |
| $\alpha/^\circ$                                | 90.00                                                          |
| $\beta/^\circ$                                 | 90.00                                                          |
| $\gamma/^\circ$                                | 90.00                                                          |
| Volume/Å <sup>3</sup>                          | 4173.0(2)                                                      |
| Z                                              | 8                                                              |
| $\rho_{\text{calc}}/\text{cm}^3$               | 1.923                                                          |
| $\mu/\text{mm}^{-1}$                           | 23.888                                                         |
| F(000)                                         | 2336.0                                                         |
| Crystal size/mm <sup>3</sup>                   | 0.04 × 0.02 × 0.005                                            |
| Radiation                                      | Cu K $\alpha$ ( $\lambda$ = 1.54184 Å)                         |
| 2 $\Theta$ range for data collection/ $^\circ$ | 10.94 to 132.48                                                |
| Index ranges                                   | -12 ≤ h ≤ 12, -33 ≤ k ≤ 32, -16 ≤ l ≤ 13                       |
| Reflections collected                          | 7724                                                           |
| Independent reflections                        | 1677 [ $R_{\text{int}}$ = 0.0385, $R_{\text{sigma}}$ = 0.0247] |
| Data/restraints/parameters                     | 1677/1/128                                                     |
| Goodness-of-fit on F <sup>2</sup>              | 1.047                                                          |
| Final R indexes [ $I \geq 2\sigma(I)$ ]        | $R_1$ = 0.0411, $wR_2$ = 0.1036                                |
| Final R indexes [all data]                     | $R_1$ = 0.0411, $wR_2$ = 0.1037                                |
| Largest diff. peak/hole / e Å <sup>-3</sup>    | 1.04/-1.26                                                     |
| Flack parameter                                | 0.001(10)                                                      |
| CCDC number                                    | 2099189                                                        |

## FTIR results

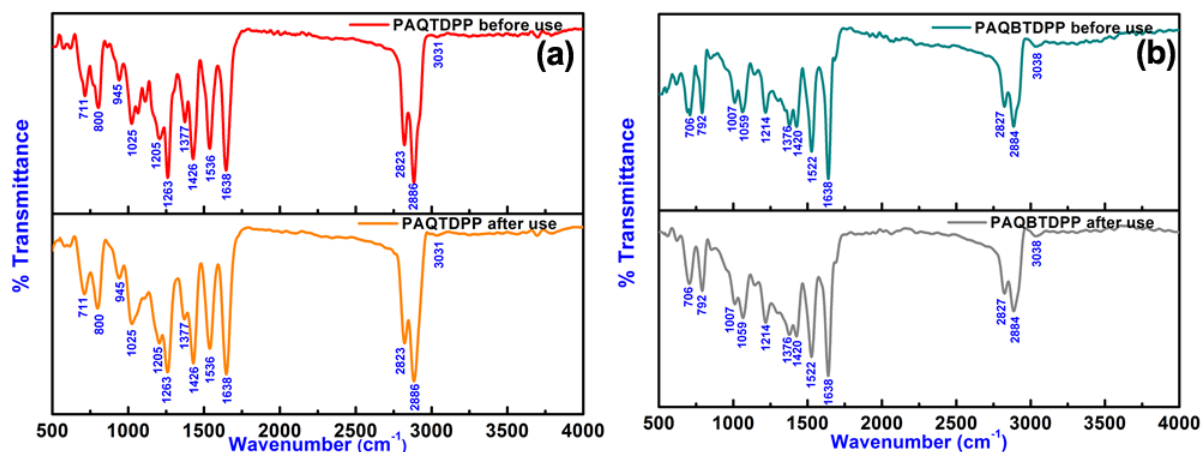

Figure S3: FTIR (ATR) spectra of (a) PAQTDPP and (b) PAQBDTPP polymers before use and after a 1 h stability test.

Table S2: FTIR analysis of PAQTDPP.

| Group                                                           | Wavenumber (cm <sup>-1</sup> ) | Intensity | Ref. |
|-----------------------------------------------------------------|--------------------------------|-----------|------|
| sp <sup>2</sup> C–H stretch (aromatic)                          | 3031                           | Weak      | 1    |
| sp <sup>3</sup> C–H stretch (aliphatic)                         | 2886                           | Strong    | 1    |
| sp <sup>3</sup> C–H stretch (aliphatic)                         | 2823                           | Strong    | 1    |
| C=O stretching (longer conjugated system)                       | 1638                           | Strong    | 1    |
| C=C stretching (aromatic)                                       | 1536                           | Medium    | 1    |
| C–N stretch                                                     | 1426                           | Strong    | 1    |
| sp <sup>3</sup> C–H bending (aliphatic)                         | 1377                           | Medium    | 1    |
| sp <sup>2</sup> C–O stretching (tutomeric =C–O <sup>-</sup> )   | 1263                           | strong    | 1    |
| sp <sup>3</sup> C–C stretch                                     | 1200                           | Medium    | 1    |
| sp <sup>3</sup> C–O stretch                                     | 1025                           | Medium    | 1    |
| sp <sup>2</sup> C–H bending (out of plane)                      | 941                            | Medium    | 1    |
| sp <sup>2</sup> C=C stretch (para di-substituted aromatic ring) | 800                            | Medium    | 1    |
| sp <sup>3</sup> CH <sub>2</sub> bending in-plane (rocking)      | 711                            | Medium    | 1    |

Table S3: FTIR analysis of PAQBDPP.

| Group                                                           | Wavenumber (cm <sup>-1</sup> ) | Intensity | Ref. |
|-----------------------------------------------------------------|--------------------------------|-----------|------|
| sp <sup>2</sup> C–H stretch (aromatic)                          | 3038                           | Weak      | 1    |
| sp <sup>3</sup> C–H stretch (aliphatic)                         | 2884                           | Strong    | 1    |
| sp <sup>3</sup> C–H stretch (aliphatic)                         | 2827                           | Strong    | 1    |
| C=O stretching(longer conjugated system)                        | 1638                           | Strong    | 1    |
| C=C stretching (aromatic)                                       | 1522                           | Strong    | 1    |
| C-N stretch                                                     | 1420                           | Strong    | 1    |
| sp <sup>3</sup> C-H bending (aliphatic)                         | 1376                           | Strong    | 1    |
| sp <sup>3</sup> C-C stretch                                     | 1200                           | Medium    | 1    |
| sp <sup>3</sup> C-O stretch                                     | 1059                           | Medium    | 1    |
| sp <sup>2</sup> C-H bending (out of plane)                      | 1007                           | Medium    | 1    |
| sp <sup>2</sup> C=C stretch (para di-substituted aromatic ring) | 792                            | Medium    | 1    |
| sp <sup>3</sup> CH <sub>2</sub> bending in-plane (rocking)      | 706                            | Medium    | 1    |
| sp <sup>2</sup> C-H out of plane bending ( aromatic)            | 620                            | Weak      | 1    |

## NMR Spectra

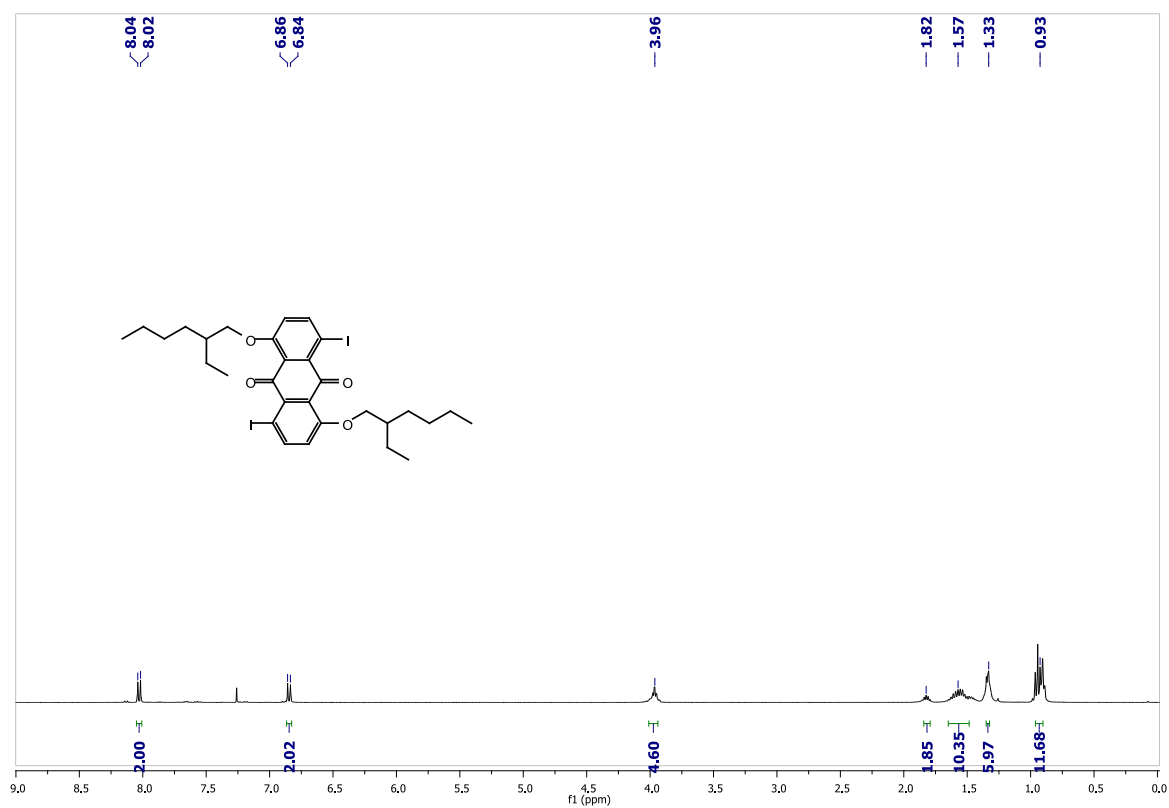

Figure S4: <sup>1</sup>H NMR spectra of compound **6**.

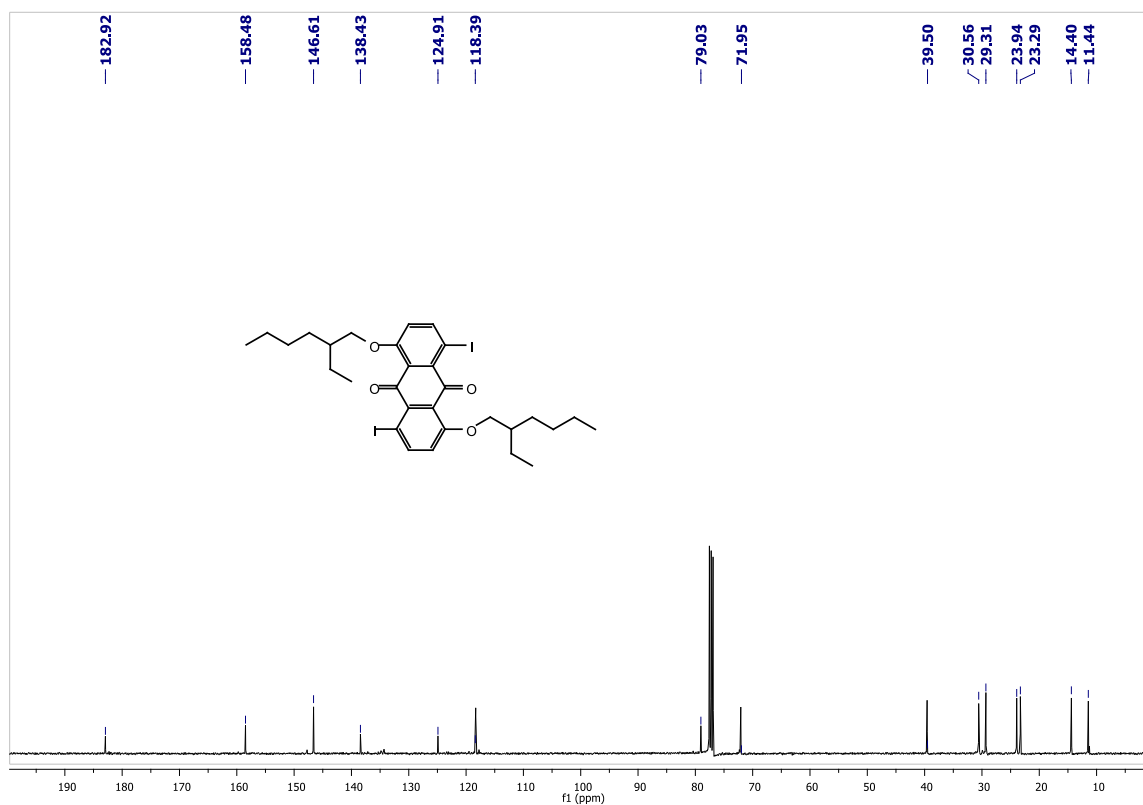

Figure S5: <sup>13</sup>C NMR spectra of compound **6**.

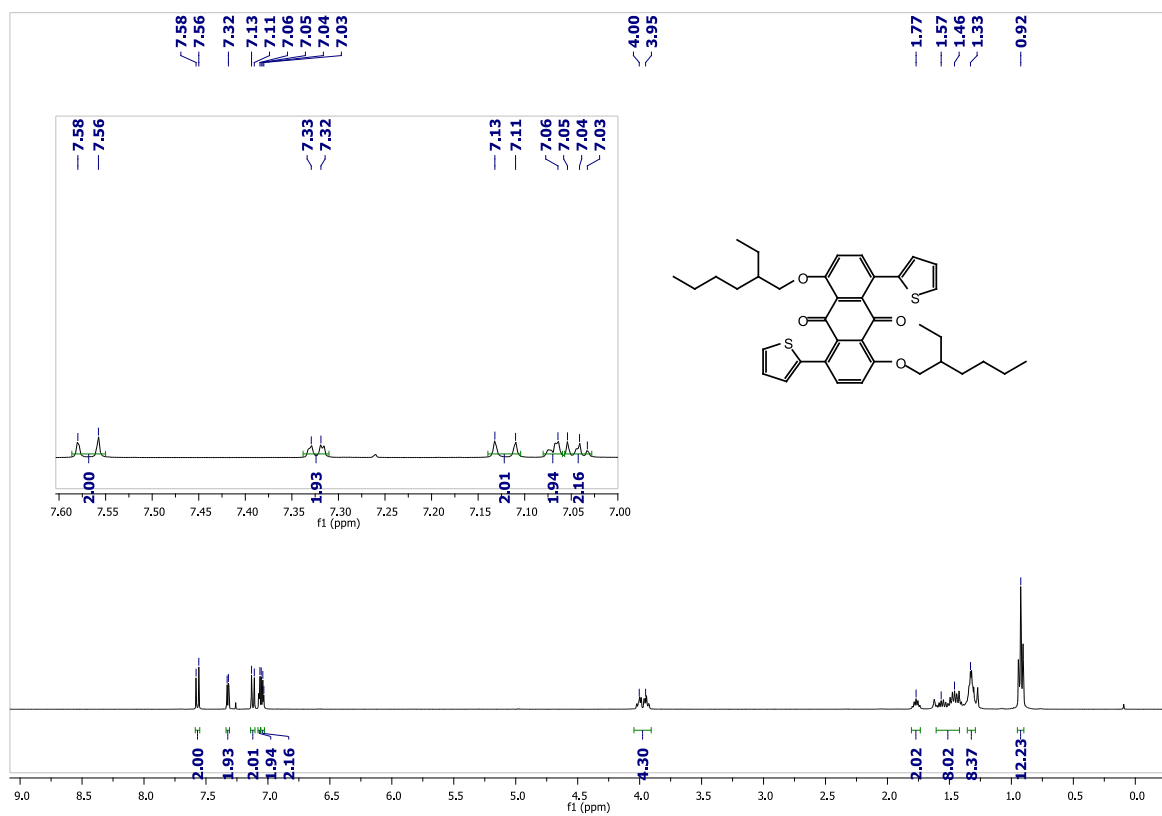

Figure S6: <sup>1</sup>H NMR spectra of compound **6**.

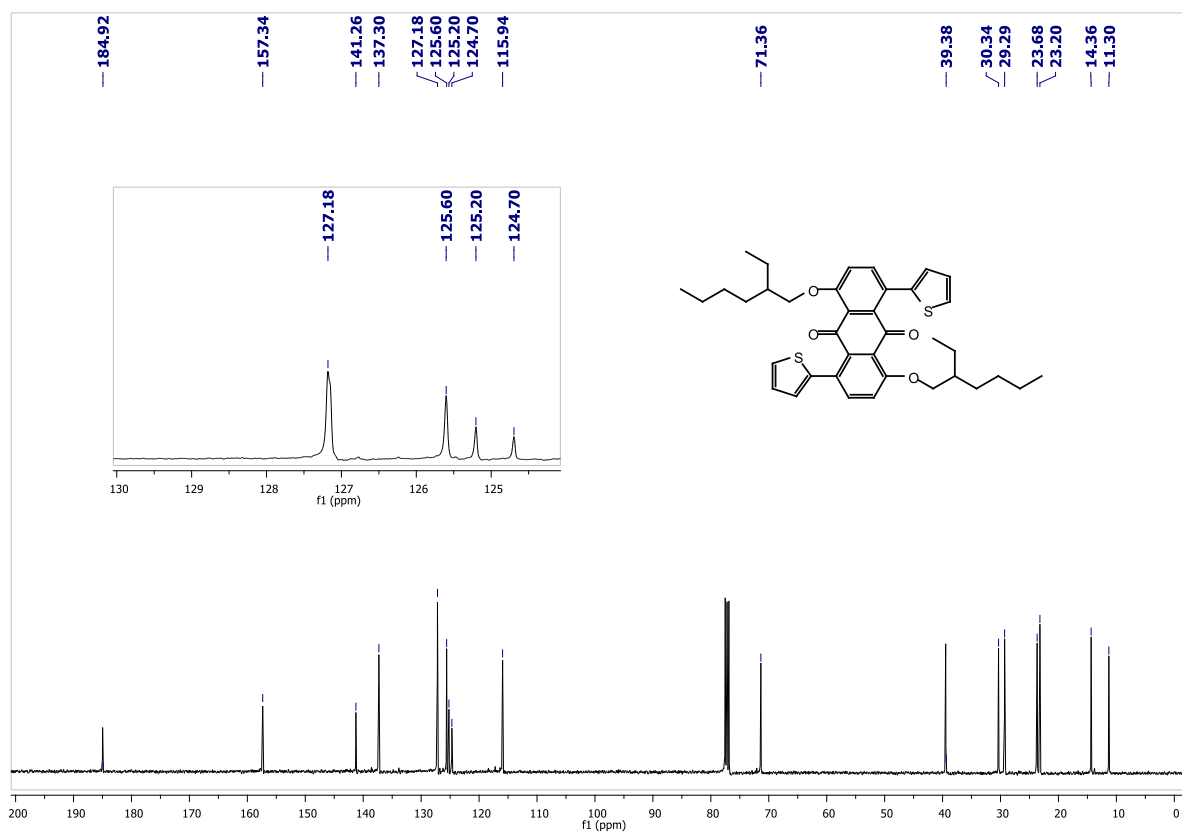

Figure S7: <sup>13</sup>C NMR spectrum of compound 5.

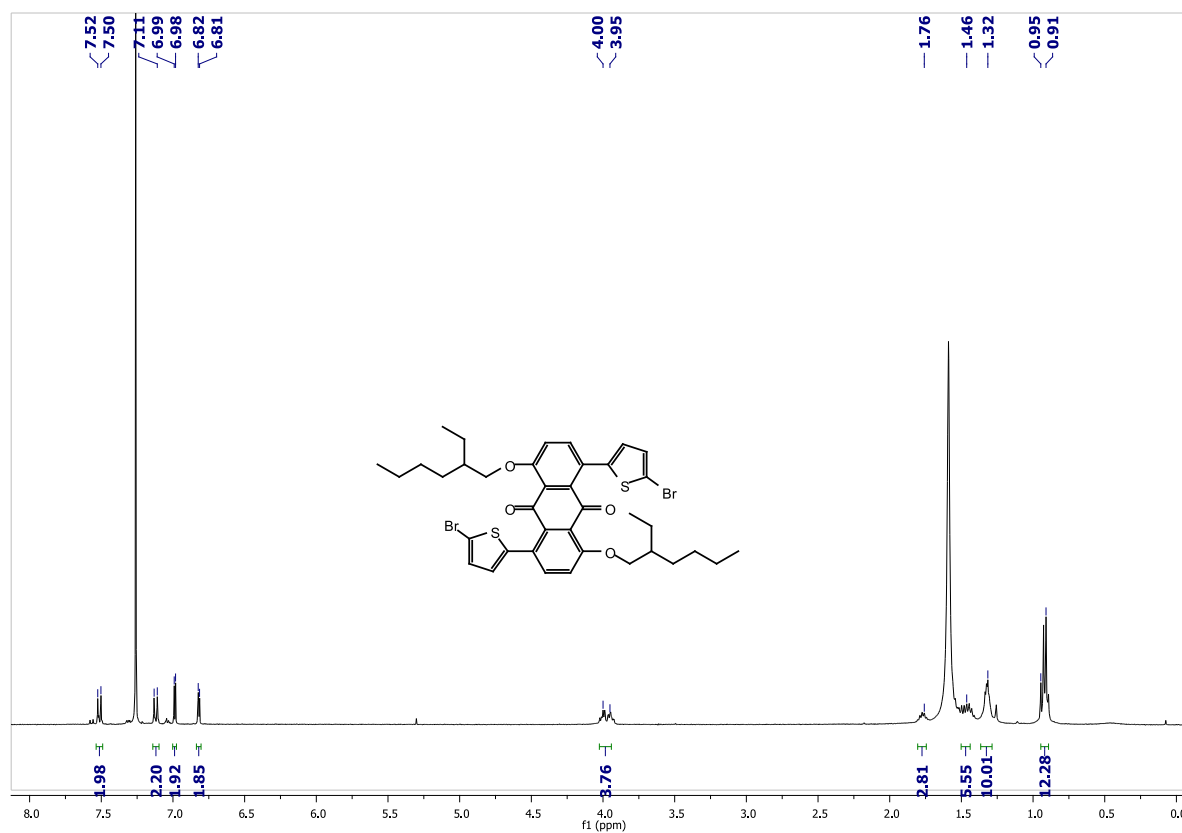

Figure S8: <sup>1</sup>H NMR spectra of compound 7.

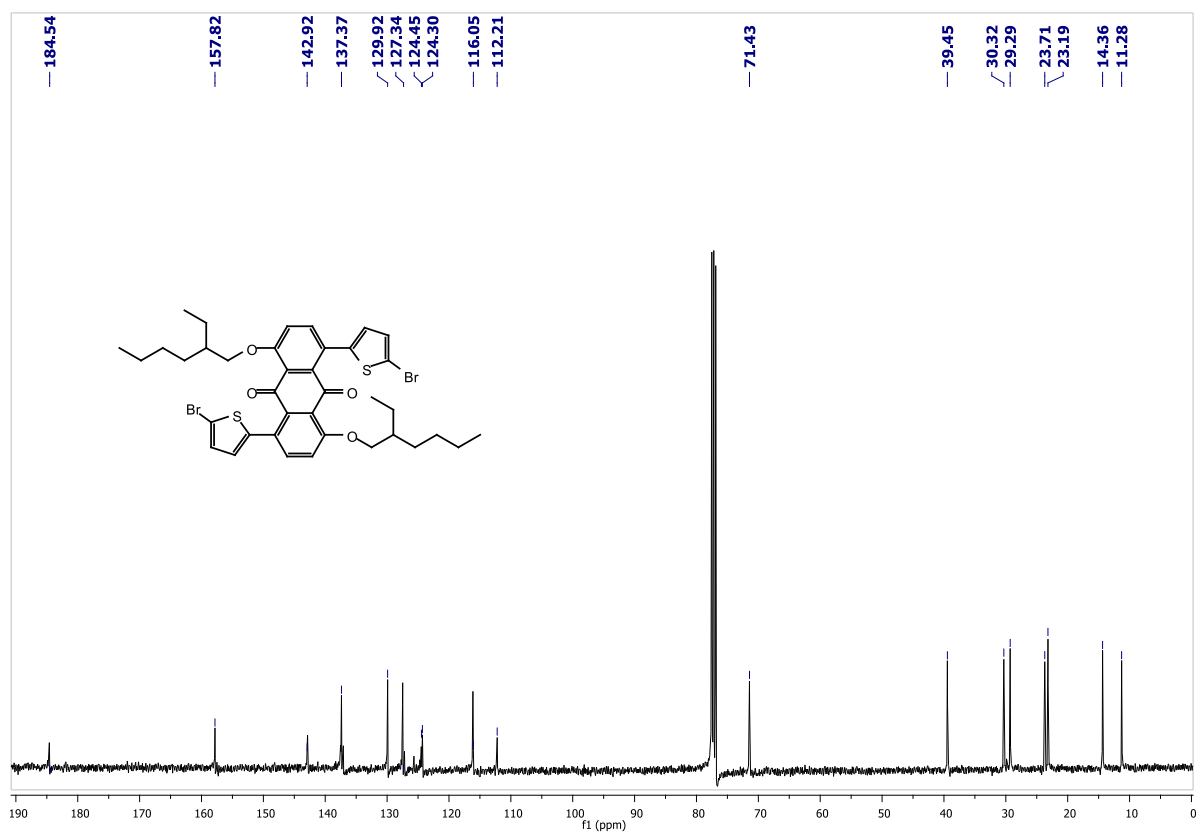

Figure S9: <sup>13</sup>C NMR spectra of compound 7.

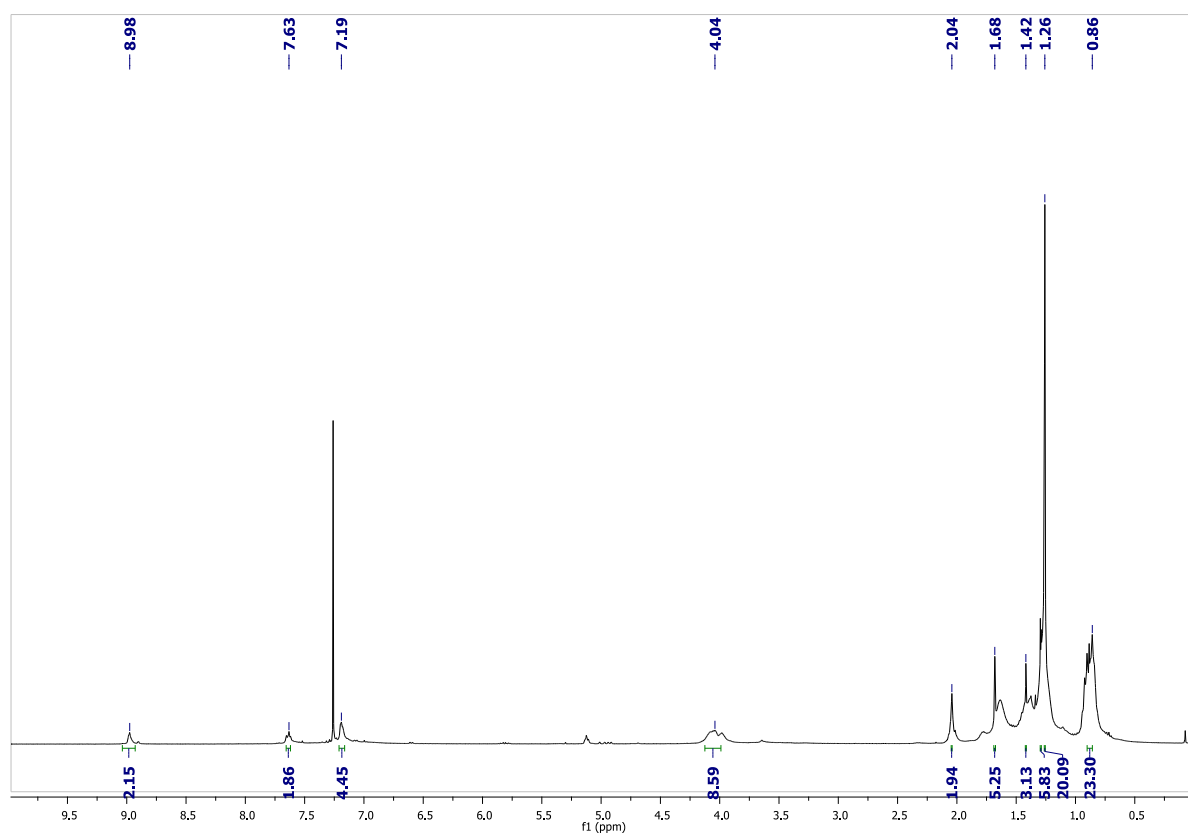

Figure S10: <sup>1</sup>H NMR spectra of PAQTDPP.

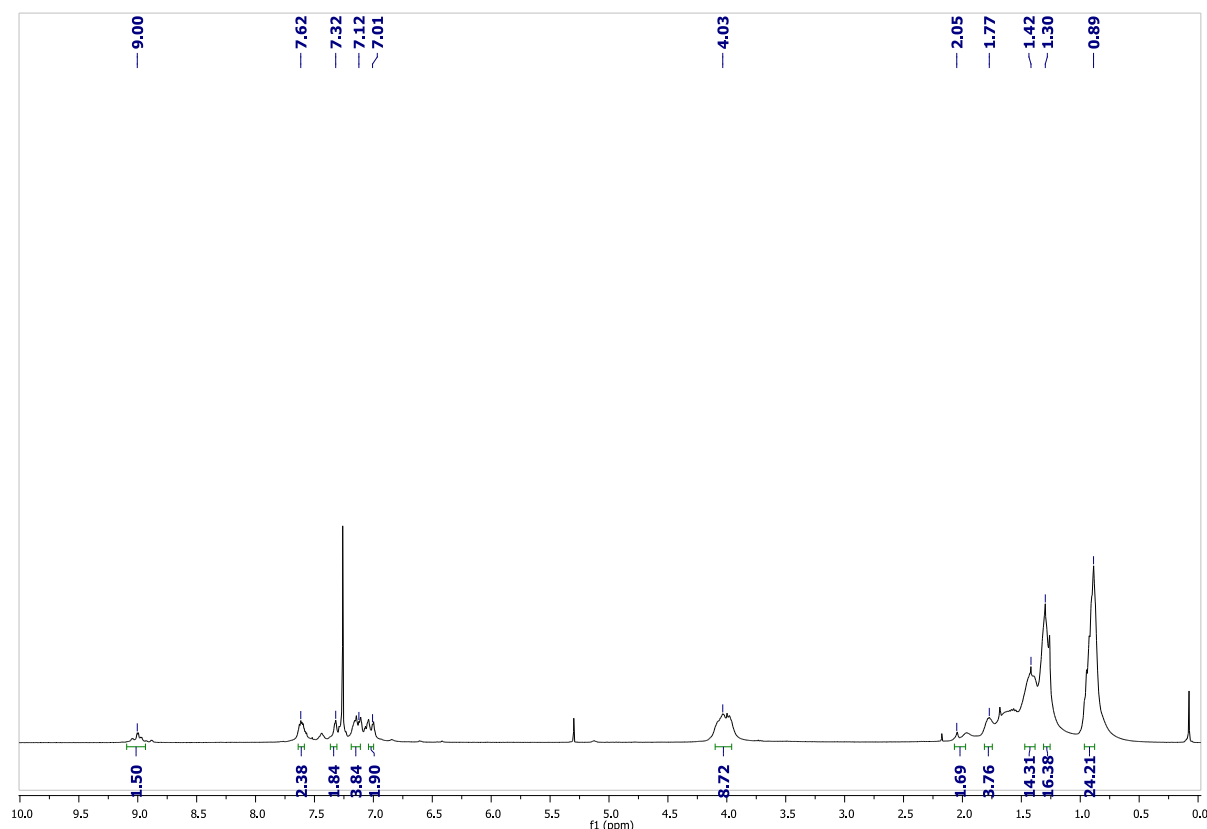

Figure S11:  $^1\text{H}$  NMR spectra of PAQBDPP.

### Theoretical Calculation

The HOMO (highest occupied molecular orbital) and LUMO (lowest unoccupied molecular orbital) coefficients of PAQTDPP and PAQBDPP were calculated via DFT calculation at B3LYP/6-31G(d) using the Gaussian 16 package. The HOMO and LUMO diagrams of PAQTDPP and PAQBDPP are given in Figure S12. Using those optimized structures of PAQTDPP and PAQBDPP, the time-dependent density-functional theory (TDDFT) calculations were performed at B3LYP/6-31G(d) to predict their theoretical UV-Vis-NIR spectra (Figure S13).

Table S4: Major Orbital contribution of absorption spectra of PAQTDPP and PAQBRDPP.

|                    | Ground State | Excited State | oscillator strength |
|--------------------|--------------|---------------|---------------------|
| PAQTDPP at 587 nm  | HOMO-1       | LUMO+2        | 0.68377             |
|                    | HOMO-1       | LUMO+4        | 0.10761             |
|                    | HOMO         | LUMO+2        | 0.11060             |
| PAQBDTPP at 617 nm | HOMO         | LUMO          | 0.21456             |
|                    | HOMO         | LUMO+1        | 0.12624             |
|                    | HOMO         | LUMO+2        | 0.49326             |
|                    | HOMO         | LUMO+3        | 0.42773             |

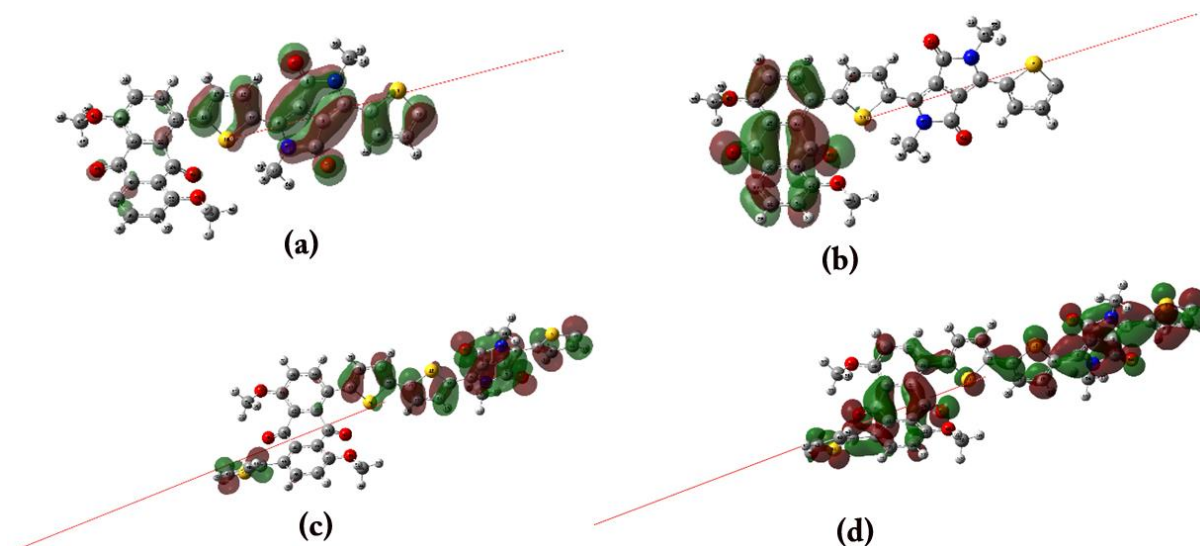

Figure S12: HOMO representation of (a) PAQTDPP and (c) PAQBTDP. LUMO representation of (b) PAQTDPP and (d) PAQBTDP.

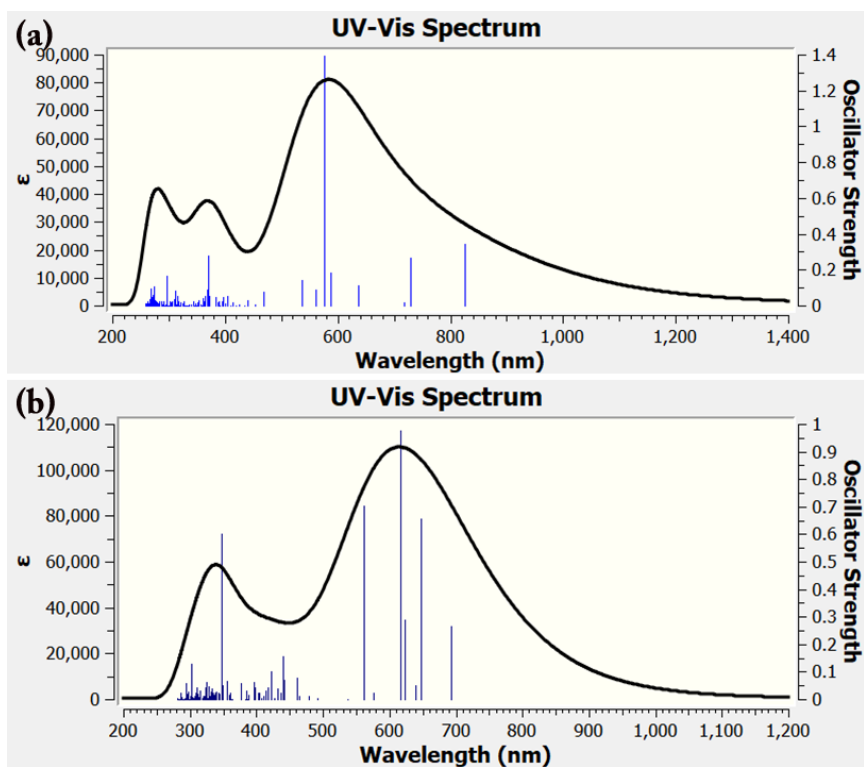

Figure S13: Theoretically predicted UV-Vis-NIR spectra of the (a) PAQTDPP and (b) PAQBTDP polymers.

## FESEM micrographs of NHs samples used for stability test

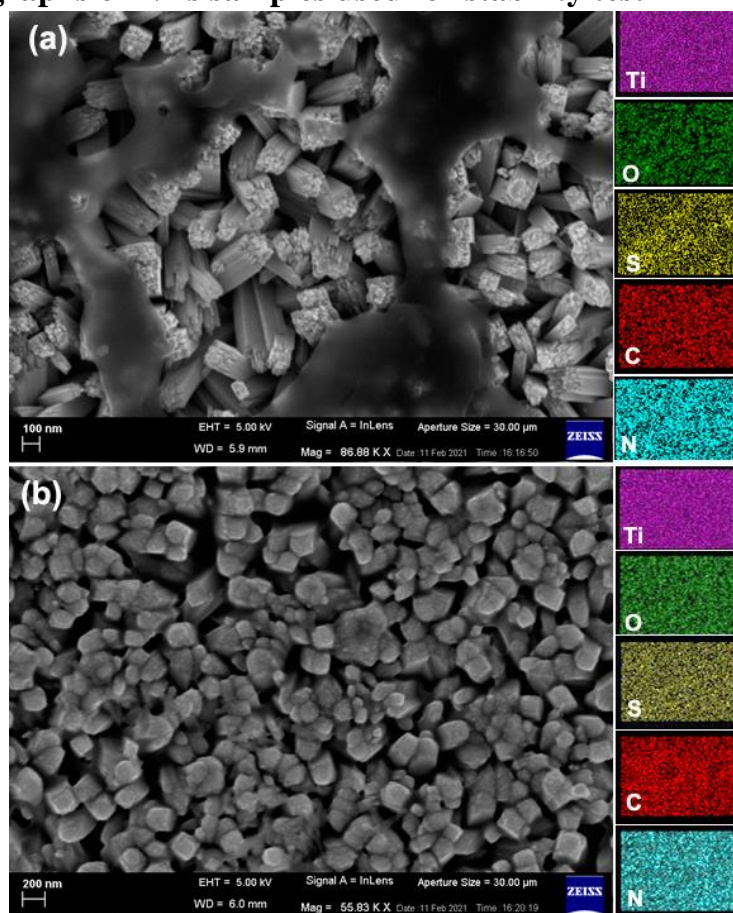

Figure S14: FESEM micrographs with corresponding EDS color mappings of (a) N-TiO<sub>2</sub>/PAQTDPP NHs and (b) N-TiO<sub>2</sub>/PAQBDTPP NHs, after 1 h stability test.

## Water oxidation onset potential

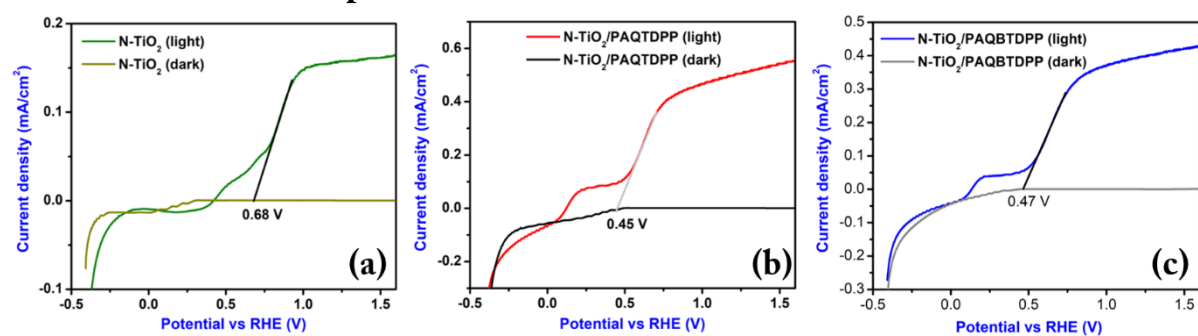

Figure S15: The current density vs. applied potential plots under dark and visible-light illuminated conditions for estimating the oxidation onset potential ( $V_{op}$ ) of (a) N-TiO<sub>2</sub> NRs, (b) N-TiO<sub>2</sub>/PAQTDPP NHs, and (c) N-TiO<sub>2</sub>/PAQBDTPP NHs electrodes.

## Additional impedance studies

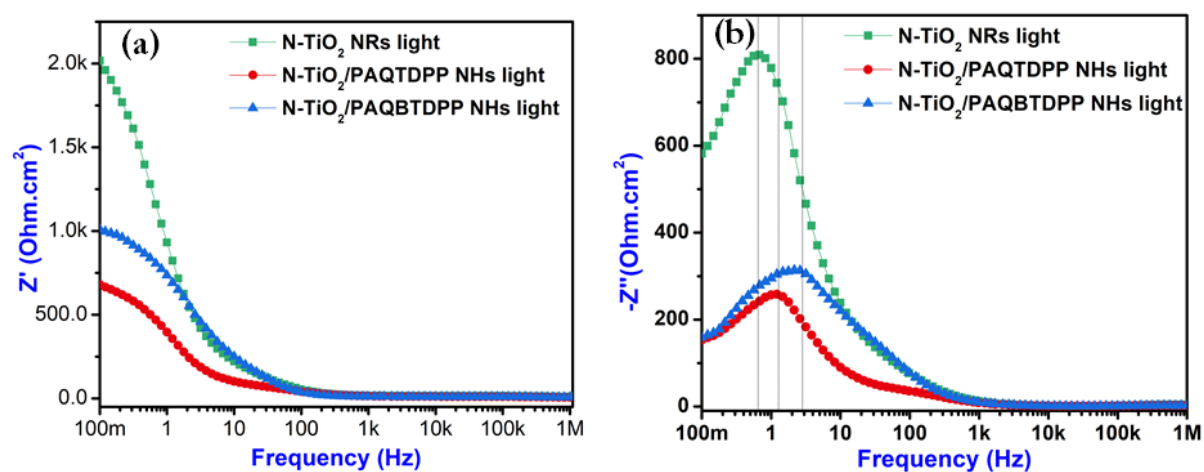

Figure S16: Room temperature (a)  $Z'$  vs frequency plot (b)  $Z''$  vs frequency plot for the three photoelectrodes.

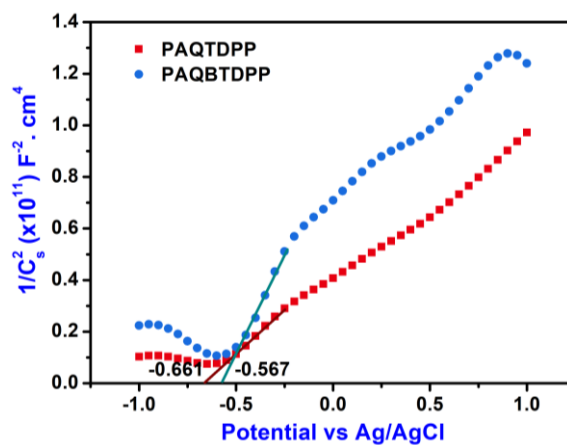

Figure S17: Mott-Schottky plots of PAQTDPP and PAQBDPP polymers coated on FTO.

## Comparison of the performances of the present electrodes with the other inorganic/organic hybrid photoanodes

Table S5: PEC performances of some reported inorganic/organic hetero-structured photoanodes.

| Photoanode                                                              | Electrolyte                                                        | Photocurrent density $J_{ph}$ (scan rate)                             | Maximum photoconversion efficiency% | Light intensity (mW/cm <sup>2</sup> ) |
|-------------------------------------------------------------------------|--------------------------------------------------------------------|-----------------------------------------------------------------------|-------------------------------------|---------------------------------------|
| FTO/Ti <sup>3+</sup> /TiO <sub>2</sub> /P1 <sup>[2]</sup>               | 0.5 M aq. Na <sub>2</sub> SO <sub>4</sub>                          | 0.50 mA/cm <sup>2</sup> at 1.23 V <sub>RHE</sub> . (10 mV/s)          | 0.26                                | 100                                   |
| FTO/Ti <sup>3+</sup> /TiO <sub>2</sub> /P2 <sup>[2]</sup>               | 0.5 M aq. Na <sub>2</sub> SO <sub>4</sub>                          | 0.28 mA/cm <sup>2</sup> at 1.23 V <sub>RHE</sub> . (10 mV/s)          | 0.11                                | 100                                   |
| FTO/BBL/TiO <sub>2</sub> /Ni-Co <sup>[4]</sup>                          | 0.5 M aq. Na <sub>2</sub> SO <sub>4</sub> /phosphate buffer (pH 7) | 0.03 mA/cm <sup>2</sup> at 1.23 V <sub>RHE</sub> . (10 mV/s)          | NA                                  | 100                                   |
| NiFe-MOF/TiO <sub>2</sub> <sup>[5]</sup>                                | 0.5 M aq. Na <sub>2</sub> SO <sub>4</sub>                          | 0.77 mA/cm <sup>2</sup> at 1.23 V <sub>RHE</sub> . (50 mV/s)          | 0.19                                | 100                                   |
| ITO/PMPDI/CoO <sub>x</sub> <sup>[6]</sup>                               | 0.1 M pH 7 KPi buffer                                              | 0.15 mA/cm <sup>2</sup> at 1 V <sub>Ag/AgCl</sub> . (5 mV/s)          | NA                                  | 100                                   |
| ITO/ZnO/PC <sub>71</sub> BM <sup>[7]</sup>                              | 0.1 M aq. KOH                                                      | 0.06 mA/cm <sup>2</sup> at 1.23 V <sub>RHE</sub> . (not mentioned)    | NA                                  | 100                                   |
| FTO/TiO <sub>2</sub> /RGO <sub>(0.1%)</sub> <sup>[8]</sup>              | 0.5 M aq. H <sub>2</sub> SO <sub>4</sub>                           | 0.2 mA/cm <sup>2</sup> at 1.23 V <sub>RHE</sub> . (not mentioned)     | NA                                  | 100                                   |
| FTO/Fe <sub>2</sub> O <sub>3</sub> /Melanin <sup>[9]</sup>              | 80 mM phosphate (pH 7.5)                                           | 0.78 mA/cm <sup>2</sup> at 1.23 V <sub>RHE</sub> . (not mentioned)    | NA                                  | 100                                   |
| (TiO <sub>2</sub> /BPEI/MoS <sub>2</sub> ) <sub>2</sub> <sup>[10]</sup> | 0.5 M aq. Na <sub>2</sub> SO <sub>4</sub>                          | ~0.3 mA/cm <sup>2</sup> at 1.23 V <sub>RHE</sub> . (5 mV/s)           | 0.16                                | 100                                   |
| FTO/TiO <sub>2</sub> /Au/Polythiophene <sup>[11]</sup>                  | 0.5 M aq. Na <sub>2</sub> SO <sub>4</sub>                          | 0.24 mA/cm <sup>2</sup> at 0.8 V <sub>Ag/AgCl</sub> . (not mentioned) | 0.11                                | 50                                    |

| Photoanode                                            | Electrolyte                               | Photocurrent density $J_{ph}$ (scan rate)                     | Maximum photoconversion efficiency% | Light intensity ( $mW/cm^2$ ) |
|-------------------------------------------------------|-------------------------------------------|---------------------------------------------------------------|-------------------------------------|-------------------------------|
| FTO/PANI-TiO <sub>2</sub> <sup>[12]</sup>             | 0.1 M aq. NaOH                            | ~0.01 mA/cm <sup>2</sup> at 1.23 V <sub>RHE</sub> . (10 mV/s) | NA                                  | 100                           |
| FTO/B-TiO <sub>2</sub> /NDIEHTh@Au-Pd <sup>[13]</sup> | 0.5 M aq. Na <sub>2</sub> SO <sub>4</sub> | 1.09 mA/cm <sup>2</sup> at 1.23 V <sub>RHE</sub> . (10 mV/s)  | 0.32                                | 100                           |
| FTO/N-TiO <sub>2</sub> /PAQTDPP (This work)           | 0.5 M aq. Na <sub>2</sub> SO <sub>4</sub> | 0.504 mA/cm <sup>2</sup> at 1.23 V <sub>RHE</sub> (10 mV/s)   | 0.19                                | 100                           |
| FTO/N-TiO <sub>2</sub> /PAQBTDPP (This work)          | 0.5 M aq. Na <sub>2</sub> SO <sub>4</sub> | 0.397 mA/cm <sup>2</sup> at 1.23 V <sub>RHE</sub> (10 mV/s)   | 0.12                                | 100                           |

## PL studies

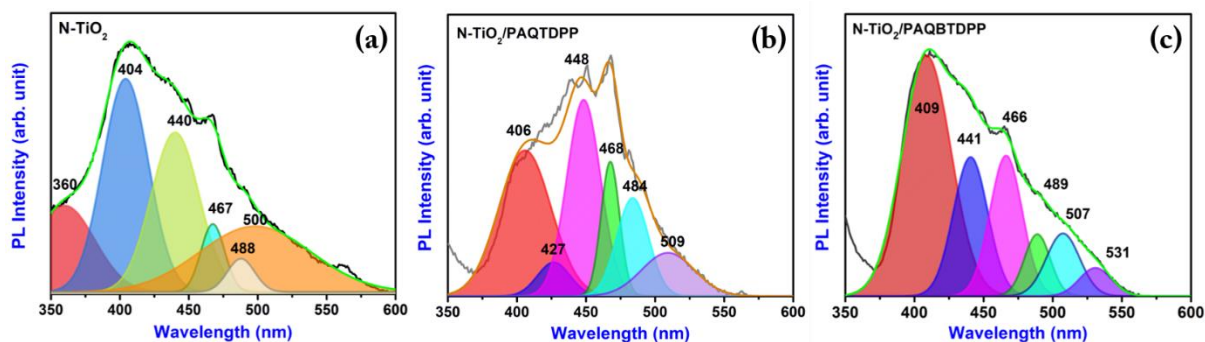

Figure S18: Gaussian curve-fitted PL spectra of (a) N-TiO<sub>2</sub> NRs, (b) N-TiO<sub>2</sub>/PAQTDPP NHs, and (c) N-TiO<sub>2</sub>/PAQBTDPP NHs.

Table S6: FWHM values of different Gaussian peaks of the deconvoluted PL spectra shown in Figure S18.

|                                  | Peak Position (nm) | FWHM (nm) |
|----------------------------------|--------------------|-----------|
|                                  |                    |           |
| N-TiO <sub>2</sub> NRs           | 360                | 51.72     |
|                                  | 404                | 39.25     |
|                                  | 440                | 41.09     |
|                                  | 467                | 20.27     |
|                                  | 488                | 23.31     |
|                                  | 500                | 95.46     |
| N-TiO <sub>2</sub> /PAQTDPP NHs  | 406                | 44.75     |
|                                  | 427                | 27.84     |
|                                  | 448                | 28.91     |
|                                  | 468                | 15.85     |
|                                  | 484                | 27.15     |
|                                  | 509                | 44.92     |
| N-TiO <sub>2</sub> /PAQBDTPP NHs | 409                | 41.78     |
|                                  | 441                | 29.44     |
|                                  | 466                | 27.63     |
|                                  | 489                | 22.03     |
|                                  | 507                | 28.50     |
|                                  | 531                | 27.38     |

Table S7: Relevant data for calculating  $\tau_{\text{avg}}$

| Compound | B <sub>1</sub>        | B <sub>2</sub>        | B <sub>3</sub>        | $\tau_1$ (ns) | $\tau_2$ (ns) | $\tau_3$ (ns) | $\tau_{\text{avg}}$ (ns) |
|----------|-----------------------|-----------------------|-----------------------|---------------|---------------|---------------|--------------------------|
| PAQTDPP  | $6.72 \times 10^{-3}$ | $4.08 \times 10^{-2}$ | $7.52 \times 10^{-4}$ | 0.44          | 0.91          | 3.68          | 0.886                    |
| PAQBDTPP | $2.92 \times 10^{-2}$ | $1.92 \times 10^{-2}$ | $6.71 \times 10^{-5}$ | 0.74          | 0.93          | 5.06          | 0.824                    |

## References

- [1] E. Heyer, R. Ziessel, *Synlett* **2015**, 26, 2109.
- [2] N. G. Ghosh, A. Sarkar, S. S. Zade, *Chem. Eng. J.* **2021**, 407, 127227.
- [3] A. Sarkar, K. Karmakar, A. K. Singh, K. Mandal, G. G. Khan, *Phys. Chem. Chem. Phys.* **2016**, 18, 26900.
- [4] P. Bornoz, M. S. Prévot, X. Yu, N. Guijarro, K. Sivula, *J. Am. Chem. Soc.* **2015**, 137, 15338.
- [5] W. Cui, H. Bai, J. Shang, F. Wang, D. Xu, J. Ding, W. Fan, W. Shi, *Electrochim. Acta* **2020**, 349, 136383.
- [6] J. T. Kirner, J. J. Stracke, B. A. Gregg, R. G. Finke, *ACS Appl. Mater. Interfaces* **2014**, 6, 13367.
- [7] L. Wang, D. Yan, D. W. Shaffer, X. Ye, B. H. Layne, J. J. Concepcion, M. Liu, C.-Y. Nam, *Chem. Mater.* **2018**, 30, 324.
- [8] A. Morais, C. Longo, J. R. Araujo, M. Barroso, J. R. Durrant, A. F. Nogueira, *Phys. Chem. Chem. Phys.* **2016**, 18, 2608.
- [9] C. Lee, D. Jeon, S. Bae, H. Kim, Y. Han, Y. W. Lee, J. Ryu, *ChemSusChem* **2018**, 11, 3534.
- [10] Z.-Q. Wei, X.-C. Dai, S. Hou, Y.-B. Li, M.-H. Huang, T. Li, S. Xu, F.-X. Xiao, *J. Mater. Chem. A* **2020**, 8, 177.
- [11] W. Fan, C. Chen, H. Bai, B. Luo, H. Shen, W. Shi, *Appl. Catal. B Environ.* **2016**, 195, 9.
- [12] D. Hidalgo, S. Bocchini, M. Fontana, G. Saracco, S. Hernández, *RSC Adv.* **2015**, 5, 49429.
- [13] D. M. Sanke, N. G. Ghosh, S. Das, H. S. Karmakar, A. Sarkar, S. S. Zade, *J. Colloid Interface Sci.* **2021**, 601, 803.
